# Supplementary material
Source: PubMed Central journal article supplement (PMC4322092)
Supplement: Supp_Table1.pdf [file Supp_Table1.pdf]

## Supplementary Data

SUPPLEMENTARY TABLE S1. COMPARISON IN ADJUSTED MEAN VALUES WITH CONFIDENCE INTERVALS BETWEEN ALL PARTICIPANTS WITH AVAILABLE 3,5-T2 SERUM CONCENTRATIONS AND A EUTHYROID SUBPOPULATION

| Characteristic                     | Whole (n = 887)   |                                |                                 | Euthyroid (n = 759) |                                |                                 | p*    |
|------------------------------------|-------------------|--------------------------------|---------------------------------|---------------------|--------------------------------|---------------------------------|-------|
|                                    | <0.2 nM           | 0.2–0.33 nM                    | >0.33 nM                        | <0.2 nM             | 0.2–0.34 nM                    | >0.34 nM                        |       |
| TSH, mIU/L                         | 1.06 (1.00; 1.14) | 1.22 (1.14; 1.31) <sup>†</sup> | 1.11 (1.04; 1.19) <sup>‡</sup>  | 1.09 (1.03; 1.15)   | 1.20 (1.13; 1.28) <sup>†</sup> | 1.18 (1.11; 1.25)               | 0.04  |
| Body mass index, kg/m <sup>2</sup> | 27.3 (26.8; 27.8) | 27.5 (27.0; 28.0)              | 27.4 (26.9; 27.9)               | 27.1 (26.6; 27.6)   | 27.6 (27.1; 28.1)              | 27.3 (26.7; 27.8)               | 0.47  |
| Waist circumference, cm            | 88.6 (87.4; 89.8) | 89.4 (88.1; 90.7)              | 88.3 (87.1; 89.6)               | 88.0 (86.8; 89.3)   | 89.5 (88.1; 90.8)              | 88.1 (86.8; 89.5)               | 0.25  |
| Waist-to-height ratio              | 0.52 (0.51; 0.53) | 0.52 (0.52; 0.53)              | 0.52 (0.51; 0.53)               | 0.52 (0.51; 0.52)   | 0.53 (0.52; 0.53)              | 0.52 (0.51; 0.52)               | 0.16  |
| Visceral fat, L                    | 3.00 (2.79; 3.20) | 3.14 (2.91; 3.37)              | 2.95 (2.75; 3.18)               | 2.87 (2.66; 3.10)   | 3.10 (2.86; 3.37)              | 2.86 (2.63; 3.09)               | 0.27  |
| Subcutaneous fat, L                | 7.0 (6.6; 7.3)    | 7.0 (6.6; 7.4)                 | 6.8 (6.5; 7.2)                  | 6.9 (6.5; 7.3)      | 6.9 (6.5; 7.4)                 | 6.8 (6.4; 7.2)                  | 0.92  |
| HDL-cholesterol, mmol/L            | 1.44 (1.40; 1.48) | 1.48 (1.44; 1.52)              | 1.47 (1.43; 1.51)               | 1.44 (1.40; 1.48)   | 1.47 (1.43; 1.52)              | 1.48 (1.44; 1.52)               | 0.35  |
| LDL-cholesterol, mmol/L            | 3.41 (3.31; 3.51) | 3.45 (3.35; 3.56)              | 3.38 (3.28; 3.49)               | 3.39 (3.29; 3.50)   | 3.43 (3.32; 3.54)              | 3.41 (3.30; 3.53)               | 0.88  |
| Total cholesterol, mmol/L          | 5.5 (5.4; 5.6)    | 5.5 (5.4; 5.6)                 | 5.4 (5.3; 5.6)                  | 5.5 (5.4; 5.6)      | 5.5 (5.4; 5.6)                 | 5.5 (5.3; 5.6)                  | 0.98  |
| Total triglycerides, mmol/L        | 1.22 (1.16; 1.29) | 1.23 (1.16; 1.30)              | 1.25 (1.18; 1.33)               | 1.21 (1.14; 1.29)   | 1.22 (1.15; 1.30)              | 1.23 (1.16; 1.31)               | 0.93  |
| Vaspin, ng/mL                      | 0.66 (0.58; 0.74) | 0.59 (0.52; 0.67)              | 0.67 (0.59; 0.76)               | 0.63 (0.56; 0.72)   | 0.58 (0.51; 0.66)              | 0.64 (0.56; 0.72)               | 0.59  |
| Leptin, ng/mL                      | 9.6 (8.9; 10.4)   | 10.7 (9.9; 11.6)               | 9.8 (9.1; 10.6)                 | 9.4 (8.7; 10.2)     | 10.8 (9.9; 11.8) <sup>†</sup>  | 9.7 (8.9; 10.6)                 | 0.07  |
| Serum glucose, mmol/L              | 5.36 (5.30; 5.42) | 5.35 (5.29; 5.42)              | 5.47 (5.41; 5.54) <sup>†#</sup> | 5.36 (5.29; 5.43)   | 5.34 (5.27; 5.42)              | 5.49 (5.42; 5.56) <sup>†#</sup> | <0.01 |
| HbA1c, %                           | 5.2 (5.1; 5.2)    | 5.2 (5.2; 5.3)                 | 5.2 (5.2; 5.3)                  | 5.2 (5.1; 5.2)      | 5.2 (5.1; 5.3)                 | 5.2 (5.2; 5.3)                  | 0.56  |
| HOMA-IR                            | 0.82 (0.76; 0.89) | 0.80 (0.74; 0.87)              | 0.84 (0.78; 0.92)               | 0.81 (0.74; 0.88)   | 0.79 (0.72; 0.86)              | 0.85 (0.78; 0.93)               | 0.51  |
| Insulin, $\mu$ IU/mL               | 3.44 (3.20; 3.70) | 3.34 (3.09; 3.61)              | 3.45 (3.20; 3.73)               | 3.38 (3.13; 3.66)   | 3.30 (3.04; 3.58)              | 3.47 (3.19; 3.76)               | 0.71  |

\*Test by analysis of variance if the beta coefficient of the 3,5-T2 group variable was a main effect in the linear regression model. <sup>†</sup> $p < 0.05$  compared with  $< 0.2$  nM and <sup>‡</sup> $p < 0.05$  compared with intermediate group by  $t$ -test.
