# Supplementary material
Source: PubMed Central journal article supplement (PMC4322092)
Supplement: Supp_Table2.pdf [file Supp_Table2.pdf]

SUPPLEMENTARY TABLE S2. SPEARMAN CORRELATION COEFFICIENTS BETWEEN SERUM CONCENTRATIONS OF 3,5-T2 AND THYROID HORMONES

| <i>Thyroid hormone</i>        | <i>M</i> ± <i>SD</i> | <i>r</i> <sub>whole</sub> (n = 104) | p    | <i>M</i> ± <i>SD</i> | <i>r</i> <sub>euthyroid</sub> (n = 64) | p    |
|-------------------------------|----------------------|-------------------------------------|------|----------------------|----------------------------------------|------|
| Free triiodothyronine, pmol/L | 4.9 ± 1.0            | -0.14                               | 0.17 | 5.0 ± 0.7            | 0.04                                   | 0.74 |
| Free thyroxine, pmol/L        | 13.0 ± 2.2           | -0.02                               | 0.87 | 12.4 ± 1.6           | -0.13                                  | 0.30 |

*r*, correlation coefficient; *M*, mean; *SD*, standard deviation.
